# Supplementary material
Source: Springer Nature journal article supplement (https://www.springermedizin.de/resource/supplementary/12958_2003_12_MOESM2_ESM.pdf/9566162)

PRLR +/+

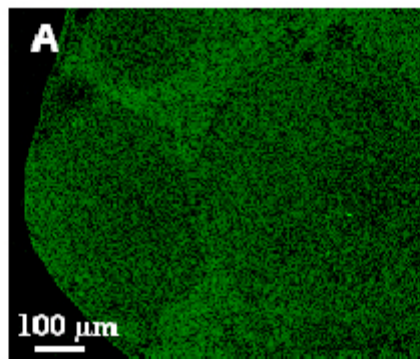

PRLR -/-

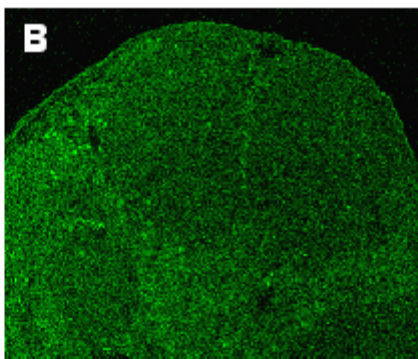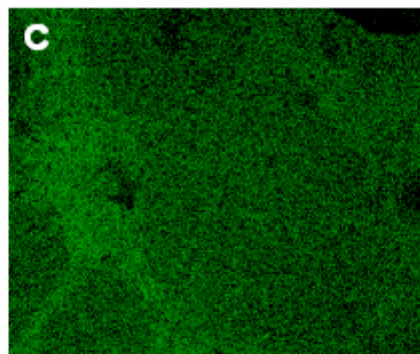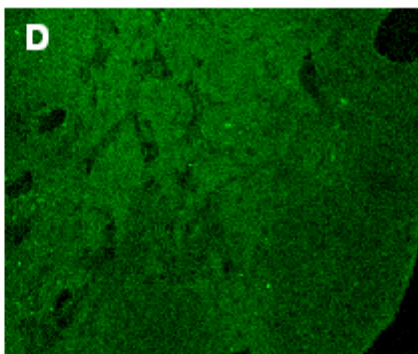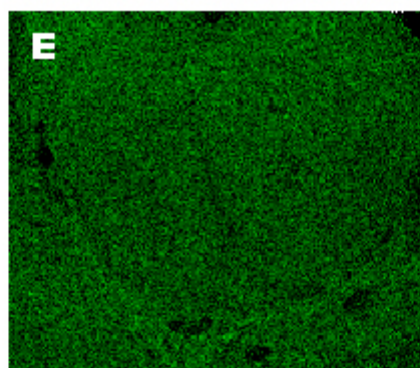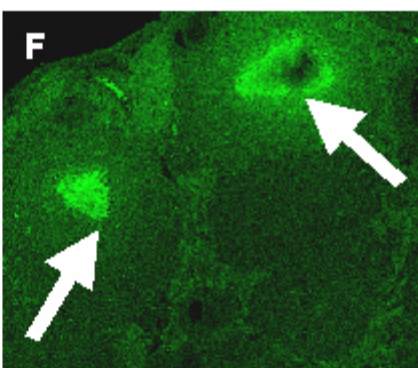

Supplement: MOESM2 [file 9566162]
